# Supplementary material for: Cross-Classification of Human Urinary Lipidome by Sex, Age, and Body Mass Index
Source: PLoS One. 2016 Dec 14;11(12):e0168188. doi: 10.1371/journal.pone.0168188 (PMC5156423; doi:10.1371/journal.pone.0168188)
Supplement: S1 Table — (XLSX) [file pone.0168188.s002.xlsx]

## Sheet: S1 Table (revise)
	S1 Table. Information on healthy urine donors.
	Sex	Age	Ethnicity	14 Hour Fasting Prior to Collection	Height	Weight	BMI		Sex	Age	Ethnicity	14 Hour Fasting Prior to Collection	Height	Weight	BMI
					(cm)	(kg)							(cm)	(kg)
	Young Women	25	White	YES	170.182	128.822	44.48		Young Men	25	White	YES	170.182	66.2256	22.8665
	Young Women	25	White	YES	167.642	139.709	49.7117		Young Men	26	White	YES	154.942	52.164	21.7287
	Young Women	25	White	YES	149.861	61.236	27.2663		Young Men	26	White	YES	185.422	113.854	33.1149
	Young Women	25	White	YES	167.642	76.2048	27.1155		Young Men	27	White	YES	167.642	58.0608	20.6594
	Young Women	26	White	YES	154.942	76.2048	31.7428		Young Men	27	White	YES	182.882	108.864	32.5493
	Young Women	26	White	YES	182.882	147.42	44.0771		Young Men	28	White	YES	167.642	59.8752	21.305
	Young Women	27	White	YES	162.562	93.4416	35.3592		Young Men	28	White	YES	172.722	78.0192	26.1521
	Young Women	28	White	YES	154.942	59.8752	24.9407		Young Men	29	White	YES	172.722	108.864	36.4913
	Young Women	29	White	YES	162.562	128.822	48.7477		Young Men	30	White	YES	172.722	80.2872	26.9124
	Young Women	30	White	YES	170.182	123.833	42.7572		Young Men	31	White	YES	165.102	68.9472	25.2937
	Young Women	30	White	YES	172.722	139.709	46.8305		Young Men	31	White	YES	170.182	52.164	18.0113
	Young Women	32	White	YES	157.482	108.864	43.8958		Young Men	31	White	YES	175.262	89.3592	29.0914
	Young Women	33	White	YES	157.482	63.9576	25.7888		Young Men	31	White	YES	185.422	78.9264	22.9561
	Young Women	34	White	YES	167.642	86.184	30.6663		Young Men	32	White	YES	172.722	109.318	36.6434
	Young Women	34	White	YES	157.482	76.6584	30.91		Young Men	33	White	YES	157.482	72.576	29.2639
	Elderly Women	55	White	YES	162.562	90.72	34.3294		Elderly Men	55	White	YES	175.262	80.2872	26.1379
	Elderly Women	56	White	YES	162.562	114.307	43.255		Elderly Men	55	White	YES	167.642	69.8544	24.8559
	Elderly Women	56	White	YES	157.482	71.2152	28.7152		Elderly Men	57	White	YES	177.802	73.9368	23.3877
	Elderly Women	58	White	YES	170.182	94.8024	32.7335		Elderly Men	57	White	YES	190.502	71.6688	19.7483
	Elderly Women	58	White	YES	162.562	96.1632	36.3891		Elderly Men	57	White	YES	182.882	75.7512	22.6489
	Elderly Women	59	White	YES	172.722	106.596	35.7311		Elderly Men	57	White	YES	180.342	63.504	19.5258
	Elderly Women	59	White	YES	154.942	62.5968	26.0744		Elderly Men	57	White	YES	185.422	67.1328	19.5259
	Elderly Women	59	White	YES	167.642	79.38	28.2453		Elderly Men	59	White	YES	175.262	91.1736	29.6821
	Elderly Women	60	White	YES	170.182	100.699	34.7696		Elderly Men	59	White	YES	180.342	101.606	31.2412
	Elderly Women	60	White	YES	162.562	82.5552	31.2397		Elderly Men	59	White	YES	177.802	72.576	22.9573
	Elderly Women	60	White	YES	175.262	107.957	35.1459		Elderly Men	60	White	YES	165.102	95.256	34.9453
	Elderly Women	61	White	YES	167.642	78.0192	27.7611		Elderly Men	61	White	YES	167.642	68.9472	24.5331
	Elderly Women	62	White	YES	165.102	101.153	37.1086		Elderly Men	62	White	YES	175.262	77.5656	25.2519
	Elderly Women	62	White	YES	152.402	65.772	28.3179		Elderly Men	62	White	YES	187.962	80.2872	22.7251
	Elderly Women	63	White	YES	157.482	74.3904	29.9955		Elderly Men	64	White	YES	187.962	116.122	32.8679
