# Supplementary material for: Cross-Classification of Human Urinary Lipidome by Sex, Age, and Body Mass Index
Source: PLoS One. 2016 Dec 14;11(12):e0168188. doi: 10.1371/journal.pone.0168188 (PMC5156423; doi:10.1371/journal.pone.0168188)
Supplement: S2 Table — (XLSX) [file pone.0168188.s003.xlsx]

## Sheet: S2 Table (revise)
	S2 Table. The list of MRM transitions (M1, precursor; M2, fragment; RT, retention times) for the analysis.
	Compound name	InChI Key	M1	M2	RT	Double bond	Precursor	Pathway
	12-HHT	KUKJHGXXZWHSBG-WBGSEQOASA-N	279.2	179.2	18.56	w6	AA	COX
	9-HOTrE	RIGGEAZDTKMXSI-MEBVTJQTSA-N	293.2	171.1	20.31	w3	ALA	LOX
	9-KODE	LUZSWWYKKLTDHU-ZJHFMPGASA-N	293.2	185.1	26.17	w6	LA	LOX
	9-HODE	NPDSHTNEKLQQIJ-ZJHFMPGASA-N	295.2	171.1	24.29	w6	LA	LOX
	EPA	JAZBEHYOTPTENJ-JLNKQSITSA-N	301.2	257.2	36.03	w3	ALA	-
	AA	YZXBAPSDXZZRGB-DOFZRALJSA-N	303.2	259.2	38.72	w6	-	-
	Trans-EKODE	RCMABBHQYMBYKV-BUHFOSPRSA-N	309.2	209.2	20.46	w6	LA	Autooxidation
	Tetranor PGAM	HYPIFMOQVFWSBF-WCQYABFASA-N	309.3	291.2	4.78	w6	AA	COX
	9-HpODE	JGUNZIWGNMQSBM-ZJHFMPGASA-N	311.2	185.1	25.4	w6	LA	LOX
	AA-d8	YZXBAPSDXZZRGB-FBFLGLDDSA-N	311.2	267.2	38.72	-	-	-
	PG J2 15-deoxy	VHRUMKCAEVRUBK-GODQJPCRSA-N	315.2	271.2	21.39	w6	AA	COX
	12-HEPE	MCRJLMXYVFDXLS-CGNHZTSISA-N	317.2	179.1	22.73	w3	EPA	LOX
	18-HEPE	LRWYBGFSVUBWMO-UXNZXXPISA-N	317.2	215.1	20.82	w3	EPA	P450
	5-HEPE	FTAGQROYQYQRHF-FCWZHQICSA-N	317.2	115.1	24.02	w3	EPA	LOX
	8,9-EET	DBWQSCSXHFNTMO-ZZMPYBMWSA-N	319.2	155.1	31.76	w6	AA	P450
	14,15-EET	JBSCUHKPLGKXKH-LLZJRKGESA-N	319.2	219.1	29.3	w6	AA	P450
	11,12-EET	DXOYQVHGIODESM-LZXKBWHHSA-N	319.2	167.1	30.87	w6	AA	P450
	12-HETE	ZNHVWPKMFKADKW-VXBMJZGYSA-N	319.2	179.1	26.7	w6	AA	LOX
	15-HETE	JSFATNQSLKRBCI-USWFWKISSA-N	319.2	219.1	24.97	w6	AA	LOX
	18-HETE	PPCHNRUZQWLEMF-XBOCNYGYSA-N	319.2	261.2	22.55	w6	AA	P450
	19-HETE	XFUXZHQUWPFWPR-DZBJBCEBSA-N	319.2	275.4	21.66	w6	AA	P450
	20-HETE	NNDIXBJHNLFJJP-DTLRTWKJSA-N	319.2	289.2	22	w6	AA	P450
	5,6-EET	VBQNSZQZRAGRIX-GSKBNKFLSA-N	319.2	191.2	32.14	w6	AA	P450
	5-HETE	KGIJOOYOSFUGPC-XTDASVJISA-N	319.2	115.1	28.38	w6	AA	LOX
	8-HETE	NLUNAYAEIJYXRB-HEJOTXCHSA-N	319.2	155.1	26.93	w6	AA	LOX
	2,3-Dinor-8-iso-PGF2a	IDKLJIUIJUVJNR-JSEKUSAISA-N	325.4	237.3	7.14	w6	AA	COX
	tPGDM/tPGEM	VNJBSPJILLFAIC-BZPMIXESSA-N /ZJAZCYLYLVCSNH-JHJVBQTASA-N	327.1	309.1	3.44	w6	AA	COX
	15-HETE-d8	JSFATNQSLKRBCI-JCAMWLGVSA-N	327.2	226.2	24.81	-	-	-
	DHA	MBMBGCFOFBJSGT-KUBAVDMBSA-N	327.2	283.2	38.23	w3	ALA	-
	DPA	YUFFSWGQGVEMMI-JLNKQSITSA-N	329.2	285.2	39.08	w3	ALA	-
	Adrenic acid	TWSWSIQAPQLDBP-DOFZRALJSA-N	331.2	287.2	40.05	w6	AA	-
	17,18-diHETE	XYDVGNAQQFWZEF-YQLHGUCYSA-N	335.2	247.2	15.2	w3	EPA	P450
	11,12-diHETrE	LRPPQRCHCPFBPE-LZXKBWHHSA-N	337.2	167.2	19.8	w6	AA	P450
	14,15-diHETrE	SYAWGTIVOGUZMM-KZTFMOQPSA-N	337.2	207.2	18.45	w6	AA	P451
	5,6-diHETrE	GFNYAPAJUNPMGH-GSKBNKFLSA-N	337.2	145	22.81	w6	AA	P450
	8,9-diHETrE	DCJBINATHQHPKO-ZZMPYBMWSA-N	337.2	127.1	20.99	w6	AA	P450
	LTB4-d4	VNYSSYRCGWBHLG-PHKHWAPOSA-N	339.2	197.1	16.02		-	-
	2,3-Dinor-TXB2	RJHNVFKNIJQTQF-LMIBIYGPSA-N	341.1	123.2	7.26	w6	AA	COX
	10-HDoHE	DDCYKEYDTGCKAS-SKSHMZPZSA-N	343.2	153.1	26.28	w3	DHA	Autooxidation
	13-HDoHE	SEVOKGDVLLIUMT-SKSHMZPZSA-N	343.2	193.1	25.69	w3	DHA	Autooxidation
	14-HDoHE	ZNEBXONKCYFJAF-OUKOMXQNSA-N	343.2	205.1	26.14	w3	DHA	LOX
	20-HDoHE	YUZXOJOCNGKDNI-LFVREGEGSA-N	343.2	241.1	24.3	w3	DHA	P450
	LXA4	IXAQOQZEOGMIQS-SSQFXEBMSA-N	351.1	217.1	11.03	w6	AA	LOX
	Prostaglandin E2	XEYBRNLFEZDVAW-ARSRFYASSA-N	351.2	271.2	9.72	w6	AA	COX
	Prostaglandin F2a	PXGPLTODNUVGFL-YNNPMVKQSA-N	353.2	193.1	9.48	w6	AA	COX
	PGE2-d4	XEYBRNLFEZDVAW-YOLMOHOWSA-N	355.2	275.2	9.7		-	-
	19,20-diHDoPE	FFXKPSNQCPNORO-MWEXLPNRSA-N	361.2	273.2	18.56	w3	DHA	P450
	11-Dehydro-TXB2	KJYIVXDPWBUJBQ-UHHGALCXSA-N	367.1	161.1	9.78	w6	AA	COX
	PG F1a-6keto	KFGOFTHODYBSGM-ZUNNJUQCSA-N	369.2	163.1	7.71	w6	AA	COX
	TXB2	XNRNNGPBEPRNAR-JQBLCGNGSA-N	369.2	195.1	8.8	w6	AA	COX
	In this study, 46 metabolites, including 5 PUFAs and 41 oxylipins, were scanned with MRM transitions. Gray indicates internal standards. AA, arachidonic acid; ALA, linolenic acid; DHA, Docosahexaenoic acid; DPA, Docosapentaenoic acid; EPA, eicosapentaenoic acid; LA, linoleic acid; diHDoHE, dihydroxydocosahexaenoic acid; diHETE, dihydroxyeicosatetraenoic acid; diHETrE, dihydroxyeicosatrienoic acid…
