# Supplementary material for: Cross-Classification of Human Urinary Lipidome by Sex, Age, and Body Mass Index
Source: PLoS One. 2016 Dec 14;11(12):e0168188. doi: 10.1371/journal.pone.0168188 (PMC5156423; doi:10.1371/journal.pone.0168188)
Supplement: S3 Table — (XLSX) [file pone.0168188.s004.xlsx]

## Sheet: S3 Table (revise)
	S3 Table. Calibration to determine the analyte concentration in urine and extraction recovery.
	Coumpound	Polynomial expression	Range (nM)	Correlation coeffcient (R2)	Recovery (%)
	10-HDoHE	y = 1,028,392.1559 x0.9821	0.01-1000	0.9885	22.0933
	11,12-DiHETrE	y = 1,598,099.8401 x0.9062	0.01-1000	0.994	14.3706
	11,12-EET	y = 712916x0.9521	0.01-1000	0.9947	25.6006
	11-Dehydro-TXB2	y = 384092x0.9987	0.04-1000	0.9874	47.784
	12-HEPE	y = 708768x0.9875	0.04-1000	0.9884	34.003
	12-HETE	y = 816,089.6418 x1.0097	0.01-1000	0.9897	34.79
	14-15-DiHETrE	y = 1,362,065.3606 x0.9693	0.01-1000	0.9825	25.0476
	14-15-EET	y = 670200x0.9373	0.01-1000	0.9934	29.0999
	14-HDoHE	y = 327329x0.9675	0.01-1000	0.9963	19.5854
	15-HETE	y = 708469x0.9385	0.01-1000	0.9956	32.983
	20-HDoHE	y = 399597x0.9982	0.04-1000	0.9949	35.0998
	2-3-Dinor-8-iso-PGF2a	y = 816447x0.9408	0.01-1000	0.9938	62.7195
	5,6-DiHETrE	y = 851818x0.9474	0.01-1000	0.9955	39.659
	5,6-EET	y = 138014x0.9608	0.01-1000	0.9879	90.282
	5-HEPE	y = 1,022,293.5646 x0.9518	0.01-1000	0.9938	43.9481
	5-HETE	y = 1,114,593.4881 x0.9854	0.01-1000	0.9906	32.0098
	8,9-DiHETrE	y = 1,113,591.5545 x0.9092	0.01-1000	0.9944	19.181
	8-HETE	y = 896855x0.9629	0.04-1000	0.99	37.6543
	9-HODE	y = 947421x0.9548	0.04-1000	0.9939	30.6149
	9-HOTrE	y = 1,043,529.8569 x0.9372	0.01-1000	0.9917	54.5293
	9-KODE	y = 282385x0.9811	0.04-1000	0.9981	21.9533
	AA	y = 171191x0.9076	0.04-1000	0.9891	13.8215
	DHA	y = 240590x1.0695	0.04-1000	0.9808	13.318
	DPA	y = 340,415.3396 x0.9120	0.04-1000	0.9922	17.3076
	EPA	y = 442173x0.9774	0.01-1000	0.9983	28.8276
	Prostaglandin F2a	y = 549282x0.9688	0.01-1000	0.9827	47.3456
	Tetranor PGDM	y = 848733x0.9039	0.04-1000	0.9947	24.0939
	Trans-EKODE	y = 1,219,384.3746 x0.9653	0.01-1000	0.9814	50.8774
	The list shows polynomial expressions of the approximate fitting curve, calibration ranges (nM/injection sample), correlation coefficient (R2), and extraction recovery (percent of the peak area of the compounds spiked after the extraction/ the peak area of the compounds without extraction, expressed as a percentage). y: internal standard (IS)-normalized peak areas, x: concentration of analytes.
