# Supplementary material for: Cross-Classification of Human Urinary Lipidome by Sex, Age, and Body Mass Index
Source: PLoS One. 2016 Dec 14;11(12):e0168188. doi: 10.1371/journal.pone.0168188 (PMC5156423; doi:10.1371/journal.pone.0168188)
Supplement: S4 Table — (XLSX) [file pone.0168188.s005.xlsx]

## Sheet: S4 Table (revise)
	S4 Table. Main phospholipid levels in urine of healthy adults.
	Molecule	m/z		rt	Negative ion Median (±SE)/Positive ion Median (±SE)
		Negative	Positive		Young Women	Elderly Women	Young Men	Elderly Men	Total
	PC(16:0/18:2)	802.565 (+HCOO)	758.568 (+H)	16.35	9.46 (±1.6)/ 54.48 (±12)	19.4 (±4.1)/ 67.76 (±10)	7.69 (±1.2)/ 27.58 (±4.7)	13.36 (±5.1)/ 46.16 (±33.8)	9.79 (±1.9)/ 42.15 (±9.7)
	PC(16:0/18:1)	804.581 (+HCOO)	760.584 (+H)	19.71	8.6 (±1.9)/ 38.4 (±8.2)	12.07 (±4.4)/ 47.35 (±9.9)	8.01 (±0.9)/ 16.4 (±5.2)	8.34 (±3.7)/ 28.58 (±13.1)	8.56 (±1.6)/ 29.2 (±5)
	SM(d18:1/16:0)	747.572 (+HCOO)	703.574 (+H)	15.83	37.82 (±7.4)/ 161.6 (±23.1)	32.75 (±7.3)/ 128.89 (±29)	27.41 (±5.4)/ 60.87 (±9.6)	31.24 (±5.2)/ 93.14 (±20.2)	31.69 (±3.3)/ 94.24 (±11.7)
	PI(40:5)	911.572 (-H)	913.587 (+H)	15.55	2.62 (±0.9)/ -	4.78 (±2.9)/ -	3.43 (±1.6)/ -	3.71 (±3)/ -	3.8 (±1.2)/ -
	Cer(d18:1/14:0)		512.502 (+H)	13.77	-/ 79.55 (±28.5)	-/ 62.69 (±78)	-/ 59.79 (±92.5)	-/ 5.7 (±24.8)	-/ 33.26 (±32.6)
	Cer(d18:1/16:0)		540.533 (+H)	17.83	-/ 36.75 (±26.6)	-/ 55.71 (±34.9)	-/ 52.16 (±80.7)	-/ 32.89 (±11.6)	-/ 39.94 (±23.8)
	Cer(d18:1/22:0)		624.627 (+H)	32.84	-/ 27.63 (±17.6)	-/ 53.5 (±20.7)	-/ 30.17 (±50.1)	-/ 24.57 (±13.7)	-/ 32.87 (±15)
	Two PCs, one SM, one PI, and three Cers were quantified in the methanol fraction by UPLC-LCT. Median heights of negative and positive ion peaks were normalized to those of IS-PC (16:0/16:0 d6) and creatinine levels. PC, phosphatidylcholine; SM, sphingomyelin; PI, phosphatidylinositol; Cer, ceramide; rt, retention time; SE, standard error.
