# Supplementary material for: Cross-Classification of Human Urinary Lipidome by Sex, Age, and Body Mass Index
Source: PLoS One. 2016 Dec 14;11(12):e0168188. doi: 10.1371/journal.pone.0168188 (PMC5156423; doi:10.1371/journal.pone.0168188)
Supplement: S5 Table — (XLSX) [file pone.0168188.s006.xlsx]

## Sheet: S5  Table (revise)
	S5 Table. Individual dataset of the normalized peak height of Identified phospholipids in human urine.
	Ions	m/z	rt (min)	z	Young Men	Young Men	Young Men	Young Men	Young Men	Young Men	Young Men	Young Men	Young Men	Young Men	Young Men	Young Men	Young Men	Young Men	Young Men	Elderly Men	Elderly Men	Elderly Men	Elderly Men	Elderly Men	Elderly Men	Elderly Men	Elderly Men	Elderly Men	Elderly Men	Elderly Men	Elderly Men	Elderly Men	Elderly Men	Elderly Men	Young Women	Young Women	Young Women	Young Women	Young Women	Young Women	Young Women	Young Women	Young Women	Young Women	Young Women	Young Women	Young Women	Young Women	Young Women
	PC(16:0/18:2)+HCOO	802.565	16.3526	-1	2.46145	3.65568	3.35051	7.33609	7.69419	16.5372	4.01654	8.71987	6.79768	12.9126	10.0684	12.5865	18.4913	8.33735	6.76536	5.64118	4.45289	16.9022	3.76603	50.2812	6.22774	2.03292	20.2015	8.23468	45.3792	68.4157	42.2466	16.7354	7.79564	13.3579	7.88774	7.29106	9.45819	2.84662	7.71689	7.76528	15.8655	9.52066	20.6168	4.45508	11.4148	12.2449	4.76511	26.7108	16.6776
	PC(16:0/18:1)+HCOO	804.581	19.7094	-1	3.07681	2.19341	3.11068	8.80332	4.61651	13.2298	5.6253	8.71987	5.91246	12.9126	4.40491	8.00956	9.39936	8.33735	13.5369	2.25647	2.87536	12.7405	3.57292	50.2812	3.68572	4.06583	8.34303	6.58347	34.0344	34.2607	27.2104	8.51993	7.83432	12.9459	6.76254	6.62374	8.60289	22.773	5.14459	5.82396	12.8287	20.0891	11.6384	4.45508	13.3172	6.69579	3.17674	28.9366	11.0269
	PC(16:0/22:6)+HCOO	850.568	14.2896	-1	3.69218	1.46227	2.51289	8.80332	6.00687	6.61489	0.86543	2.90662	7.88049	3.22814	1.88782	2.28845	9.39936	11.1165	10.148	3.38471	1.4843	3.60002	3.13836	60.3375	3.16795	8.13167	3.8849	3.76198	11.3448	6.40691	22.6753	5.67995	1.64933	1.48422	5.25849	3.48878	0.633587	5.69325	10.2892	1.29421	1.83666	2.42964	3.75827	3.71257	1.90246	1.03613	3.17674	11.1295	4.16939
	SM(d18:1/16:0)+HCOO	747.572	15.8343	-1	7.99972	12.4293	16.8031	15.9369	21.5437	28.1133	16.4432	27.4124	29.7399	32.2814	20.4445	48.0574	89.2939	64.2793	37.2095	7.89765	20.6874	36.7465	20.0855	30.1688	21.7231	20.3292	33.4102	31.9769	22.6896	62.7799	77.0961	31.2397	34.2236	76.7191	17.0901	31.399	33.2334	91.357	48.8736	28.909	86.6588	92.3344	55.9378	12.6227	24.732	37.8186	7.94185	60.0992	86.1674
	PC(39:6)+HCOO	864.579	16.0274	-1	3.07681	1.46227	1.76873	3.955	2.45366	8.26862	1.28886	7.26655	2.54913	9.68443	0.629272	8.00956	4.69968	9.89981	10.148	6.76942	1.97906	2.12342	3.76603	20.1125	3.16795	11.6908	2.33094	1.88099	11.3448	1.77804	15.7357	5.67995	0.824665	2.96843	2.62925	1.74439	1.76922	14.2331	7.71689	3.84756	2.44889	3.87806	3.28848	2.22754	12.2894	2.07225	15.3799	4.45179	6.94898
	G2Cer(42:2)+HCOO	1016.73	27.2731	-1	2.39647	1.46227	0.418814	5.65921	4.61651	1.65372	0.216357	2.90662	5.6694	5.07662	2.44978	3.14598	23.4984	6.94779	8.17329	4.12667	2.2499	5.92407	1.25534	45.2531	0.905127	2.03292	2.33094	2.82149	17.7086	1.18536	26.8516	3.88797	1.237	6.67897	6.56994	1.74439	2.4351	17.0797	5.14459	5.29963	14.1509	2.72725	2.34892	0.742513	3.80493	2.07225	7.94185	13.9896	6.76854
	G3Cer(34:1)+HCOO	1068.68	13.9206	-1	1.23073	0.731137	1.43463	1.46722	2.72231	3.30745	0.324594	7.22532	3.39884	6.45628	1.25854	4.57689	33.3028	10.355	23.6787	1.32422	0.494765	6.37026	3.75989	53.8947	0.992857	4.06583	1.76015	0.940496	19.5347	0.684025	4.53506	9.59946	1.40432	1.35742	3.94387	3.45758	2.35209	4.40329	5.14459	2.13672	3.21795	2.8974	0.939566	0.962413	3.97099	2.35922	5.65576	6.31291	5.1541
	PI(40:5)-H	911.572	15.5471	-1	1.84609	3.65568	1.25644	7.33609	3.07767	6.61489	0.86543	2.90662	1.69942	25.8251	1.88782	3.43267	14.099	8.53598	6.76536	5.12143	0.989531	8.20465	3.32154	40.225	0.905127	9.19786	1.55396	1.88099	34.0344	1.69866	9.07012	5.67995	2.474	3.71054	1.31462	2.61659	2.53435	10.1027	10.2892	0.647106	1.16593	4.04939	0.923511	2.22754	7.51829	0.739767	3.41343	6.67769	8.65328
	G3Cer(42:2)+HCOO	1178.78	26.3111	-1	1.84609	1.46227	1.11883	2.45835	2.38102	4.96117	1.92741	5.81324	1.69942	16.8526	0.913921	2.28845	7.04952	2.77912	13.5307	1.12824	1.97906	3.84395	1.22158	10.0563	0.531416	4.06583	3.63092	1.88099	22.6896	2.9634	25.9532	7.09993	1.237	2.22633	5.66902	3.09762	2.2635	5.69325	5.14459	1.29421	4.28555	2.87206	0.469783	0.742513	3.80493	2.59031	6.35348	4.71698	2.77959
	SM(39:2)+HCOO	815.635	22.3699	-1	1.84609	1.46227	1.14548	5.86888	5.48273	11.5761	1.5145	8.71987	2.54913	3.22814	0.629272	9.15378	4.69968	2.77912	3.38268	3.38471	1.84285	4.24684	1.88302	40.225	0.890762	8.13167	3.10792	1.88099	11.3448	2.37072	7.00769	2.83997	0.412332	1.48422	2.62925	5.14751	4.43511	17.0797	11.6586	1.94132	3.67333	3.23951	1.87913	2.22754	9.51231	0.518063	1.58837	11.1295	1.3898
	SM(43:3)+HCOO	869.675	26.7007	-1	2.46145	3.65568	0.837628	10.2705	9.23303	5.75313	1.27423	4.26465	0.84971	12.9126	1.7345	4.57689	14.099	16.6747	13.5307	3.38471	1.42716	6.37026	2.51069	10.0563	2.26282	6.09875	1.55396	1.62858	45.3792	2.37072	20.3005	11.3599	3.27834	2.96843	2.62925	2.61659	2.53435	11.3865	10.2892	3.88264	1.22444	4.04939	1.3316	1.48503	7.60985	0.976064	1.58837	4.69905	2.53052
	Cer(d18:1/22:0)+H	624.627	32.8395	1	0.945097	2.17048	2.76263	86.5853	35.8142	268.9	42.3599	245.665	78.3735	126.549	70.8207	3.79476	59.7861	0.884881	502.797	122.377	1.13739	4.52144	123.556	5.69599	0.856686	345.306	190.197	1.7863	23.0809	1.27963	3.66283	8.39606	105.88	3.15448	117.568	403.667	127.593	163.792	10.9548	185.123	79.5472	3.73219	7.43233	243.73	96.1029	9.25882	11.1603	5.60645	17.7595
	PC(16:0/18:2)+H	758.568	16.4283	1	12.3327	62.1981	21.7128	14.7346	15.7583	28.6018	54.5978	41.7549	27.5798	41.1956	42.5393	21.5036	78.576	33.6255	16.5736	88.6513	11.8676	36.0826	28.3337	11.392	55.8711	19.9414	67.277	53.273	46.1617	54.6359	129.54	21.8178	68.2705	53.171	20.7221	19.1455	54.4773	65.7794	28.2999	35.4806	72.5529	58.0935	13.8844	25.7551	49.1662	58.4781	4.51093	48.5691	56.1354
	Cer(d18:1/16:0)+H	540.534	17.8327	1	0.756078	14.166	21.0443	86.2356	12.8931	60.0492	12.3387	243.126	54.9581	258.862	52.1619	37.9476	81.9924	18.5825	393.193	78.485	22.7478	45.2144	28.7727	28.48	20.1321	108.603	131.684	11.3133	152.334	12.7963	14.6513	32.8929	50.4823	37.7489	280.939	359.813	124.593	59.3795	35.6031	36.7486	25.1279	17.4169	10.6638	172.717	24.6434	5.81689	38.6651	39.2452	34.5325
	SM(d18:1/16:0)+H	703.574	15.92	1	6.04862	16.0531	58.3724	23.3704	32.2328	63.6236	132.924	52.4164	67.5512	102.173	60.8693	76.4894	126.247	110.826	58.8245	123.866	41.9848	110.37	93.135	11.3134	120.994	85.3452	81.6315	110.986	68.4853	319.519	133.693	49.1127	185.769	71.4828	68.9102	39.0038	161.604	116.498	54.5666	95.3378	141.17	188.055	165.089	51.9005	123.869	168.642	3.76619	52.2867	186.01
	Cer(d18:1/14:0)+H	512.503	13.7684	1	5.67466	16.4336	14.9642	62.2596	96.1113	48.6113	18.5081	158.811	41.1582	85.5719	30.1681	33.7312	59.7861	18.5825	255.606	51.3394	3.41217	47.3477	18.2912	22.784	16.6835	77.521	70.4363	13.0996	226.192	11.0901	14.6513	27.2872	35.5988	24.575	195.882	247.755	86.3474	57.0957	29.2128	24.2384	20.7877	10.3672	9.69434	75.7314	27.0837	6.94412	20.6214	54.6629	27.626
	PC(16:0/18:1)+H	760.584	19.5966	1	2.07922	6.20136	14.7966	10.7609	14.3407	22.8759	59.0689	25.9332	14.4173	35.9608	16.2461	16.3965	80.2842	20.1878	16.5736	39.8142	8.87165	27.1287	30.4652	5.69599	38.1225	16.623	19.9641	28.5808	55.3941	220.628	54.9424	19.2891	58.4196	29.8291	26.5013	7.56616	69.9849	52.3621	22.8225	24.2384	40.591	20.4746	6.32675	17.1218	40.8948	36.8287	7.08861	131.752	38.4041
				Creatinin (mM)	14.6251	41.5646	27.5995	10.9603	13.613	27.1896	46.8519	26.2262	33.6429	23.8092	10.9798	36.0393	16.4177	7.654	20.4397	35.4278	17.1837	19.5414	14.399	5.40382	4.8162	12.4532	4.73415	8.2812	8.18973	54.2094	1.90585	14.9121	10.6425	15.471	59.5607	36.6397	53.7261	24.8272	17.0679	16.1287	40.4511	14.2748	32.4584	7.78177	33.4501	26.0031	6.0337	14.6637	11.3854
	Heights of negative and positive ion peaks were normalized to IS-PC (16:0/16:0 d6) and creatinine levels. PC, phosphatidylcholine; SM, sphingomyelin; PI, phosphatidylinositol; Cer, ceramide; G2Cer, ceramide dihexoside; G3Cer, ceramide trihexoside; rt, retention time.
[truncated: 15 more columns]
