# Supplementary material for: Cross-Classification of Human Urinary Lipidome by Sex, Age, and Body Mass Index
Source: PLoS One. 2016 Dec 14;11(12):e0168188. doi: 10.1371/journal.pone.0168188 (PMC5156423; doi:10.1371/journal.pone.0168188)
Supplement: S6 Table — (XLSX) [file pone.0168188.s007.xlsx]

## Sheet: S6 Table (revise)
	S6 Table. Summarized oxylipin concentrations (umol/mmol creatine) in urne of healthy adults.
	(umol/mmol creatine)			Young Woman						Elderly Women						Young Men						Elderly Men				Total
		Median (interquartile)						Median (interquartile)						Median (interquartile)						Median (interquartile)						Median (interquartile)
	Linoleic acid (18:2 FA) & its metabolites
	9-HODE	7.44635e-05	(	0.000341078	-4.0936e-05	)		0.000148231	(	0.00123947	-0.000113278	)		5.79772e-05	(	0.000319861	-3.57622e-05	)		7.04301e-05	(	0.000210985	-5.07654e-05	)		8.83248e-05	(	0.00019309	-6.86601e-05	)
	9-KODE	9.17578e-05	(	0.000242858	-5.04527e-05	)		0.000219726	(	0.000586673	-0.000177101	)		8.35586e-05	(	0.000129235	-5.34138e-05	)		8.1415e-05	(	0.000408881	-5.23957e-05	)		0.000100726	(	0.00038957	-7.17064e-05	)
	Trans-EKODE	1.01231e-05	(	1.54769e-05	-4.66823e-06	)		1.55138e-05	(	7.33358e-05	-1.21254e-05	)		1.11877e-05	(	1.84589e-05	-7.36738e-06	)		1.12618e-05	(	6.80297e-05	-6.97827e-06	)		1.16952e-05	(	6.75963e-05	-7.41167e-06	)
	Arachidonic acids (20:4 FA) & its metabolites
	AA	0.00198239	(	0.00263765	-0.00194268	)		0.000802799	(	0.0469526	-0.000643756	)		0.000389728	(	0.00513767	-0.000296331	)		0.000714192	(	0.0075936	-0.000608727	)		0.000808717	(	0.00749907	-0.000703252	)
	11,12-diHETrE	8.41578e-07	(	7.16399e-06	-5.13458e-07	)		9.70262e-07	(	1.04858e-05	-8.2729e-07	)		6.08266e-07	(	3.84962e-06	-5.03454e-07	)		8.0611e-07	(	2.8654e-06	-6.78936e-07	)		8.44663e-07	(	2.82685e-06	-7.17489e-07	)
	11,12-EET	1.75268e-06	(	4.12215e-06	-1.2042e-06	)		2.13867e-06	(	1.74054e-05	-1.75901e-06	)		7.41973e-07	(	4.63697e-06	-3.95712e-07	)		1.4729e-06	(	2.07931e-05	-1.21426e-06	)		1.60995e-06	(	2.06561e-05	-1.35131e-06	)
	11-dehydro-TXB2	2.2996e-05	(	2.81924e-05	-1.4847e-05	)		1.84686e-05	(	5.72661e-05	-1.00708e-05	)		1.86291e-05	(	2.93951e-05	-1.34784e-05	)		1.55438e-05	(	4.11999e-05	-1.26536e-05	)		2.05813e-05	(	3.61624e-05	-1.7691e-05	)
	12-HETE	8.38445e-05	(	0.00154223	-7.87526e-05	)		4.11053e-05	(	0.00294878	-3.93102e-05	)		4.6056e-06	(	5.47875e-05	-4.17518e-06	)		1.81961e-06	(	3.10906e-05	-1.37029e-06	)		1.47713e-05	(	1.81389e-05	-1.4322e-05	)
	14,15-diHETrE	1.01214e-06	(	6.60892e-06	-8.19512e-07	)		1.03404e-06	(	5.86284e-06	-9.11719e-07	)		5.1245e-07	(	2.36287e-06	-4.11572e-07	)		7.46456e-07	(	3.5003e-06	-4.80505e-07	)		8.07152e-07	(	3.4396e-06	-5.41201e-07	)
	14,15-EET	5.33465e-06	(	1.34975e-05	-4.3263e-06	)		2.41925e-06	(	8.2791e-05	-1.57544e-06	)		1.78129e-06	(	4.36475e-05	-1.37112e-06	)		1.72132e-06	(	0.000119505	-1.41169e-06	)		1.34686e-06	(	6.91851e-05	-1.18209e-06	)
	15-HETE	4.60396e-06	(	1.12609e-05	-3.7255e-06	)		2.11122e-06	(	6.90297e-05	-1.35102e-06	)		1.56284e-06	(	3.59382e-05	-1.19538e-06	)		1.49635e-06	(	9.79748e-05	-1.22148e-06	)		2.07763e-06	(	9.73936e-05	-1.80276e-06	)
	2,3-Dinor-8-iso-PGF2a	4.2023e-05	(	7.66621e-05	-2.46342e-05	)		6.80695e-05	(	0.000209613	-4.28516e-05	)		2.9419e-05	(	0.000100105	-2.42789e-05	)		3.02904e-05	(	6.64326e-05	-2.65805e-05	)		4.30795e-05	(	5.36435e-05	-3.93696e-05	)
	5,6-diHETrE	1.79344e-06	(	8.62806e-06	-1.47516e-06	)		1.90479e-06	(	9.33095e-06	-1.5152e-06	)		1.8044e-06	(	6.72772e-06	-1.34299e-06	)		2.37191e-06	(	1.521e-05	-2.17514e-06	)		1.8546e-06	(	1.57274e-05	-1.65783e-06	)
	5,6-EET	1.2534e-06	(	2.40013e-06	-1.08468e-06	)		6.1831e-07	(	2.03549e-05	-3.98647e-07	)		3.23759e-07	(	2.39214e-06	-1.898e-07	)		4.99026e-07	(	2.04037e-06	-4.99026e-07	)		5.74575e-07	(	1.96482e-06	-5.74575e-07	)
	5-HETE	3.01877e-06	(	6.64247e-06	-2.65245e-06	)		3.07517e-06	(	2.6925e-05	-2.12625e-06	)		1.85791e-06	(	8.23974e-06	-1.10771e-06	)		1.92105e-06	(	2.0019e-05	-1.57665e-06	)		2.42715e-06	(	1.95128e-05	-2.08276e-06	)
	8,9-diHETrE	6.01064e-06	(	4.04469e-05	-5.40795e-06	)		6.13835e-06	(	3.50399e-05	-4.33868e-06	)		4.64127e-06	(	2.52088e-05	-4.1743e-06	)		5.69637e-06	(	5.91576e-05	-4.89919e-06	)		5.79969e-06	(	5.90542e-05	-5.00251e-06	)
	8-HETE	3.37166e-06	(	1.64172e-05	-2.5684e-06	)		1.66633e-06	(	7.44255e-05	-1.13616e-06	)		6.93729e-07	(	1.76538e-06	-4.64586e-07	)		6.75104e-07	(	4.48606e-06	-5.6428e-07	)		1.18581e-06	(	3.97535e-06	-1.07499e-06	)
	PGF2a	8.39549e-06	(	2.50802e-05	-4.26823e-06	)		1.22444e-05	(	3.37861e-05	-1.02818e-05	)		1.32152e-05	(	2.39992e-05	-8.31105e-06	)		8.65536e-06	(	2.34238e-05	-6.15946e-06	)		1.11707e-05	(	2.09085e-05	-8.67483e-06	)
	Tetranor PGDM and PGEM	0.000255969	(	0.000239188	-0.000181987	)		0.000220241	(	0.000244358	-0.00017601	)		0.000282159	(	0.0022959	-0.000156589	)		0.000162173	(	0.000286403	-0.000111211	)		0.000414043	(	0.000324779	-0.000352089	)
	Linolenic acid (18:3 FA) metabolites
	DPA	1.39765e-05	(	0.000116808	-1.17643e-05	)		1.19943e-05	(	0.000963218	-9.32463e-06	)		4.41645e-06	(	1.38096e-05	-3.36717e-06	)		3.39722e-06	(	6.71851e-05	-2.33916e-06	)		7.77795e-06	(	6.28044e-05	-6.71989e-06	)
	9-HOTrE	3.70956e-07	(	8.89728e-07	-1.34745e-07	)		1.3177e-06	(	1.27648e-05	-1.10467e-06	)		5.76457e-07	(	2.26168e-06	-4.30368e-07	)		5.88145e-07	(	1.21318e-06	-4.25305e-07	)		7.26083e-07	(	1.07524e-06	-5.63244e-07	)
	Eicosapentaenoic acid (20:5 FA) & its metabolites
	EPA	2.3163e-05	(	3.42433e-05	-2.05498e-05	)		1.24856e-05	(	0.000514906	-6.97611e-06	)		6.57412e-06	(	5.58658e-05	-4.87205e-06	)		9.42956e-06	(	9.81971e-05	-8.46192e-06	)		1.26683e-05	(	9.49584e-05	-1.17006e-05	)
	5-HEPE	1.09622e-06	(	2.61249e-06	-7.97842e-07	)		1.8763e-06	(	6.55392e-06	-1.47918e-06	)		1.00128e-06	(	4.08297e-06	-9.60654e-07	)		1.65389e-06	(	1.5769e-05	-1.63689e-06	)		1.38192e-06	(	1.6041e-05	-1.36493e-06	)
	12-HEPE	1.43579e-06	(	2.53044e-05	-1.22616e-06	)		2.61188e-06	(	9.60852e-05	-2.50025e-06	)		2.43812e-07	(	1.2781e-06	-2.28706e-07	)		3.53945e-07	(	4.73962e-07	-2.77887e-07	)		6.37902e-07	(	1.90005e-07	-5.61844e-07	)
	Docosahexsaenoic acid (22:6 FA) & its metabolites
	DHA	0.000631572	(	0.0010133	-0.000585779	)		0.000362865	(	0.011065	-0.000300238	)		0.000204743	(	0.000862635	-0.000167033	)		0.000212943	(	0.00238368	-0.00017397	)		0.000335712	(	0.00226091	-0.00029674	)
	10-HDoHE	9.33556e-07	(	6.6072e-06	-7.69957e-07	)		8.76795e-07	(	2.55574e-05	-6.80848e-07	)		1.75846e-07	(	4.60794e-07	-1.11014e-07	)		2.82824e-07	(	9.88365e-07	-2.25955e-07	)		3.40162e-07	(	9.31027e-07	-2.83293e-07	)
	14-HDoHE	1.05997e-05	(	0.000212718	-9.78553e-06	)		1.07553e-05	(	0.000336756	-9.84641e-06	)		6.52092e-07	(	5.58369e-06	-5.90816e-07	)		5.37351e-07	(	2.33897e-06	-4.21442e-07	)		2.2776e-06	(	5.98729e-07	-2.16169e-06	)
	20-HDoHE	1.58874e-05	(	0.00011214	-1.30803e-05	)		7.77676e-06	(	0.000223927	-6.3621e-06	)		7.98171e-06	(	0.000534515	-5.94105e-06	)		3.61405e-06	(	1.56294e-05	-3.0053e-06	)		7.87923e-06	(	1.13642e-05	-7.27048e-06	)
