# Supplementary material for: Cross-Classification of Human Urinary Lipidome by Sex, Age, and Body Mass Index
Source: PLoS One. 2016 Dec 14;11(12):e0168188. doi: 10.1371/journal.pone.0168188 (PMC5156423; doi:10.1371/journal.pone.0168188)
Supplement: S7 Table — (XLSX) [file pone.0168188.s008.xlsx]

## Sheet: S7 Table (revise)
	S7 Table. Individual dataset of oxylipin concentrations (umol/mmol creatine) in urne of healthy adults.
	Compaound (umol/mmol creatine)	YW	YW	YW	YW	YW	YW	YW	YW	YW	YW	YW	YW	YW	YW	YW	EW	EW	EW	EW	EW	EW	EW	EW	EW	EW	EW	EW	EW	EW	EW	YM	YM	YM	YM	YM	YM	YM	YM	YM	YM	YM	YM	YM	YM	YM	EM	EM	EM
	10-HDoHE	4.27294e-07	1.63598e-07	5.81027e-07	7.54076e-06	1.25332e-06	9.33556e-07	5.93587e-06	4.76218e-06	5.61974e-07	3.40461e-06	3.46186e-07	9.62004e-07	2.20435e-07	1.22974e-06	7.41158e-07	2.68023e-07	8.79776e-07	6.35632e-07	1.18519e-06	1.95947e-07	2.12892e-06	4.15687e-07	6.07938e-07	1.0601e-06	2.64342e-05	8.76795e-07	3.66081e-07	1.29779e-06	1.55639e-05	6.81981e-07	9.23834e-08	8.47325e-08	1.37603e-07	3.14201e-07	1.75846e-07	1.05635e-07	1.22762e-07	1.96212e-07	1.48444e-07	6.3664e-07	6.48318e-08	2.88986e-07	2.67608e-07	2.77057e-07	2.60125e-07	9.62581e-08	5.87214e-08	2.82824e-07
	11,12-DiHETrE	4.11322e-07	6.52843e-07	3.2812e-07	6.37697e-07	7.2933e-07	8.41578e-07	3.29444e-07	2.8988e-06	1.87587e-06	8.44242e-07	1.06552e-06	9.35977e-07	2.04434e-06	8.00556e-06	7.46398e-07	1.35411e-06	2.9171e-07	6.84512e-07	9.70262e-07	3.16339e-07	5.95155e-07	1.42972e-07	3.23458e-06	8.82279e-07	1.1456e-05	8.53299e-07	2.45312e-06	1.58873e-06	7.26253e-06	1.60936e-06	2.37988e-07	1.44977e-07	6.08266e-07	5.66744e-07	1.04813e-07	1.47532e-07	3.38862e-07	1.74925e-06	4.45788e-06	1.30561e-06	4.58527e-07	8.45084e-07	1.80518e-06	1.12518e-06	1.26558e-06	2.42466e-07	2.58209e-07	8.0611e-07
	11,12-EET	1.66727e-06	5.48476e-07	7.09283e-07	4.34811e-06	4.45239e-06	1.74195e-06	2.4161e-06	1.75268e-06	1.57162e-06	5.87483e-06	2.08992e-06	1.53111e-06	1.37792e-06	5.63215e-06	3.38138e-06	3.79655e-07	1.10127e-06	4.72027e-07	1.22904e-06	2.33242e-06	2.52584e-06	7.49871e-07	5.22894e-06	3.15935e-06	1.95441e-05	6.9621e-07	4.66409e-06	1.55797e-06	1.00414e-05	2.13867e-06	4.7679e-07	3.46261e-07	6.48789e-07	5.34442e-07	4.0192e-07	8.53133e-07	1.67983e-06	1.26529e-06	2.42575e-06	5.37894e-06	6.49399e-07	5.01292e-07	3.74032e-06	1.64828e-06	7.41973e-07	3.36567e-07	2.5864e-07	1.25882e-06
	11-dehydro-TXB2	1.05983e-05	1.72803e-05	1.88213e-05	3.74081e-05	2.71289e-05	8.14899e-06	1.99657e-05	5.11884e-05	2.2996e-05	2.85702e-05	3.06741e-05	1.78628e-05	3.86541e-05	2.1976e-05	2.69767e-05	1.11296e-05	1.83826e-05	3.51106e-05	1.57839e-05	5.46144e-05	1.15059e-05	2.36855e-05	1.02016e-05	1.84686e-05	2.35467e-05	8.39774e-06	4.81745e-05	1.4558e-05	2.77587e-05	7.57346e-05	1.67169e-05	5.15067e-06	2.34774e-05	4.0186e-05	1.86291e-05	2.56774e-05	1.49043e-05	4.80242e-05	3.52702e-05	2.81809e-05	9.82859e-06	9.71271e-06	3.96935e-05	7.65074e-06	1.57382e-05	1.55438e-05	3.51279e-06	3.10485e-05
	12-HEPE	9.34285e-07	2.09631e-07	1.65215e-06	2.67402e-05	2.39325e-06	9.36351e-07	8.50916e-06	1.26765e-05	2.02102e-06	1.1238e-05	8.65125e-07	1.43579e-06	7.73454e-07	1.3963e-06	4.47068e-07	1.11628e-07	2.64207e-06	1.33579e-06	1.18081e-06	5.21307e-07	4.41336e-06	6.07472e-07	2.61188e-06	3.87951e-06	9.86971e-05	4.51358e-06	1.33802e-06	4.45863e-06	1.83995e-05	9.496e-07	1.38492e-07	1.13436e-07	1.51008e-07	1.52191e-06	2.14158e-07	2.43812e-07	1.06478e-07	5.28376e-07	9.8857e-08	7.10788e-07	1.5106e-08	2.97296e-07	4.90405e-07	3.31199e-07	4.51606e-07	2.58653e-07	7.60586e-08	3.53945e-07
	12-HETE	6.47999e-05	5.09183e-06	9.46633e-05	0.00162607	0.000167566	4.67055e-05	0.000786982	0.000844885	8.83439e-05	0.000328953	4.29984e-05	8.38445e-05	1.46324e-05	7.17138e-05	2.89822e-05	1.7951e-06	0.000121452	3.87985e-05	3.44268e-05	8.86743e-06	0.000354041	4.66132e-06	5.66432e-05	0.000162651	0.00298988	0.000105237	3.76941e-05	4.11053e-05	0.00209541	2.3661e-05	3.59707e-06	1.16394e-06	4.30423e-07	5.93931e-05	4.62908e-06	1.69208e-06	1.79775e-06	7.61756e-06	4.6056e-06	2.24613e-05	1.57081e-06	6.61202e-06	1.49103e-05	1.97747e-06	9.22141e-06	1.81961e-06	4.49319e-07	3.5842e-06
	14-15-diHETrE	9.7522e-07	6.79962e-07	1.9263e-07	8.47324e-07	4.93422e-07	8.38714e-07	1.06479e-06	5.08245e-06	1.19087e-06	1.01214e-06	1.11276e-06	1.15364e-06	1.8709e-06	7.62106e-06	6.20708e-07	1.64216e-06	1.22318e-07	5.90009e-07	6.47143e-07	1.03404e-06	1.3251e-06	5.33006e-07	2.62447e-06	6.39099e-07	6.89688e-06	7.60829e-07	1.68074e-06	2.54427e-06	3.92919e-06	3.36058e-07	1.00879e-07	2.89666e-07	5.61763e-07	5.1245e-07	1.35379e-07	4.83477e-07	3.10597e-07	2.17194e-07	2.87532e-06	1.60147e-06	4.92294e-07	1.16614e-06	2.55023e-06	7.24115e-07	9.83129e-07	5.68386e-07	2.9464e-07	7.46456e-07
	14-15-EET	2.1783e-06	6.07274e-07	5.39266e-07	3.94698e-06	3.44158e-06	1.8927e-06	5.27494e-06	3.01891e-06	4.41086e-06	7.0326e-06	1.41094e-06	1.13082e-06	3.13654e-07	2.00831e-06	2.52005e-06	9.18153e-07	1.08445e-06	2.25476e-06	1.94411e-06	2.60396e-06	2.47294e-06	9.30951e-07	5.29327e-07	5.14499e-07	2.18818e-05	1.6454e-06	6.68798e-07	3.34878e-07	6.0259e-06	7.13812e-07	2.03638e-07	4.97532e-07	7.86305e-07	8.42651e-07	9.44251e-07	3.09427e-07	1.36722e-06	1.35121e-06	6.25485e-05	3.13954e-06	6.99936e-07	6.57027e-07	8.57112e-07	4.03672e-06	2.06931e-08	1.64773e-07	7.22483e-07	1.34251e-06
	14-HDoHE	3.21005e-06	8.14167e-07	1.68762e-05	0.000223318	2.49212e-05	4.80334e-06	9.69653e-05	6.4692e-05	1.49005e-05	1.9328e-05	4.42308e-06	5.31264e-06	1.47721e-06	1.05997e-05	9.57622e-06	9.08928e-07	1.40412e-05	9.1419e-06	7.42595e-06	1.08364e-06	2.24472e-05	1.50205e-06	1.07553e-05	3.27584e-05	0.000311593	1.67125e-05	3.08208e-06	1.65948e-05	0.000347512	2.98757e-06	4.19496e-07	6.12751e-08	1.98821e-07	6.23578e-06	6.52092e-07	8.81082e-07	3.96704e-07	6.331e-07	1.0474e-06	3.5468e-06	4.76266e-07	1.37099e-06	2.37934e-06	1.80472e-07	1.67523e-06	3.28364e-07	5.60208e-07	5.89656e-07
	15-HETE	4.60396e-06	8.78459e-07	1.32684e-06	1.42091e-05	1.26739e-05	2.18696e-06	8.77667e-06	7.8562e-06	3.19826e-06	8.24984e-06	3.34031e-06	2.86784e-06	1.23478e-06	6.26105e-06	1.58649e-05	1.75334e-06	2.5564e-06	1.3564e-06	2.04404e-06	7.602e-07	1.90795e-05	1.23625e-06	3.84548e-06	1.47704e-06	7.11409e-05	3.40246e-06	1.97059e-06	3.95813e-06	6.68779e-05	2.11122e-06	8.0471e-07	5.22111e-07	1.28969e-06	3.2925e-06	1.55939e-06	3.67462e-07	2.15285e-06	2.54852e-06	3.7501e-05	4.773e-06	6.48151e-07	1.84222e-06	1.91201e-06	5.80889e-07	1.56284e-06	1.49635e-06	1.45639e-06	1.78107e-06
	20-HDoHE	8.03845e-06	4.70518e-06	2.93915e-06	5.49957e-06	2.80706e-06	3.26427e-06	8.43746e-06	4.74265e-05	6.3944e-05	0.000128027	1.58874e-05	3.37444e-05	2.53818e-05	2.18747e-05	5.61904e-05	1.40645e-05	1.41466e-06	0.000231704	0.000106873	1.48222e-05	4.17194e-06	2.82896e-06	4.47079e-06	9.10401e-06	1.94215e-05	7.77676e-06	5.09289e-06	3.95097e-06	3.45167e-05	2.73858e-06	4.552e-06	8.24716e-05	7.98171e-06	5.87804e-06	6.99863e-06	2.04065e-06	2.65263e-05	2.07253e-05	0.000542497	6.5249e-05	0.000251903	5.3639e-06	2.04361e-06	9.97165e-05	3.45117e-06	1.17129e-06	3.06209e-06	9.71828e-06
	2-3-dinor-8-iso-PGF2a	4.2023e-05	7.01141e-05	2.61691e-05	3.97674e-05	1.73889e-05	3.64085e-05	2.49307e-05	2.85437e-05	4.00142e-05	6.18196e-05	0.000118685	5.06261e-05	5.20585e-05	5.7484e-05	4.8319e-05	2.83106e-05	8.04259e-05	5.91905e-05	5.57777e-05	8.09592e-05	5.1535e-05	7.63306e-05	8.12045e-05	8.55648e-05	6.65624e-05	2.52179e-05	0.000277683	6.80695e-05	8.02639e-05	5.29428e-05	7.17125e-06	1.61907e-05	1.8944e-05	2.9419e-05	4.20637e-05	4.40953e-05	1.70283e-05	5.14012e-06	2.07059e-05	0.000129524	1.75998e-05	3.58095e-05	0.000108368	4.43952e-05	7.57452e-05	2.28126e-05	3.7099e-06	3.88676e-05
	5,6-DiHETrE	1.79344e-06	2.1006e-06	3.18283e-07	9.24066e-07	9.74675e-07	1.48189e-06	1.63302e-06	3.94368e-06	3.38765e-06	1.42146e-06	2.22214e-06	2.21906e-06	4.66402e-06	1.04215e-05	1.13791e-06	6.57707e-06	7.11822e-07	1.55455e-06	3.84939e-06	7.04122e-07	1.33202e-06	1.00657e-06	4.11438e-06	1.22432e-06	1.12357e-05	3.89596e-07	2.94838e-06	1.90479e-06	6.36759e-06	3.41624e-06	4.61411e-07	6.44323e-07	1.24159e-06	1.8044e-06	1.26009e-06	1.09882e-06	9.87565e-07	2.9261e-06	8.53212e-06	4.25364e-06	9.88603e-07	2.04991e-06	6.64761e-06	2.50592e-06	3.32162e-06	9.7868e-07	1.9677e-07	3.6247e-06
	5,6-EET	9.63974e-07	5.49914e-07	3.09438e-07	3.12762e-06	1.93799e-06	1.16588e-06	2.45806e-06	1.2534e-06	2.72494e-07	3.65353e-06	2.2109e-06	1.06159e-06	1.68722e-07	1.65277e-06	2.29665e-06	3.11244e-07	6.1831e-07	3.92507e-07	9.06817e-07	1.10187e-06	5.99237e-07	3.45883e-07	4.56105e-07	2.83011e-07	2.09732e-05	7.99523e-07	9.61252e-07	2.19663e-07	3.6527e-06	8.555e-07	1.33959e-07	1.68316e-07	1.66492e-07	3.23759e-07	2.93301e-07	1.51762e-07	8.69922e-07	4.0989e-07	5.3364e-07	2.7159e-06	2.1479e-07	6.15276e-07	1.10656e-06	2.64799e-07	7.69863e-07	1.33195e-07	1.05151e-07	5.2274e-07
	5-HEPE	6.09741e-07	2.98381e-07	3.27951e-07	8.10352e-07	1.52609e-06	7.39587e-07	4.74129e-07	1.60595e-06	2.97904e-06	8.62899e-07	1.14603e-06	1.75841e-06	2.0792e-06	3.70871e-06	1.09622e-06	2.6071e-06	6.13242e-07	6.25388e-07	1.8763e-06	6.99906e-07	8.08036e-07	1.54068e-06	3.34288e-06	2.36702e-06	3.36236e-06	3.97127e-07	3.78453e-06	1.4629e-06	8.43022e-06	3.08728e-06	3.82596e-07	5.27249e-07	4.59297e-07	1.23875e-06	6.8115e-07	4.06299e-08	4.18119e-07	5.08426e-06	1.97972e-06	4.00294e-06	1.00128e-06	1.36657e-06	4.13124e-06	2.25451e-06	5.17191e-07	2.43255e-07	1.76208e-07	1.65389e-06
	5-HETE	3.97598e-06	9.15745e-07	3.66321e-07	6.11592e-06	4.70683e-06	2.58801e-06	4.06557e-06	5.71151e-06	3.01877e-06	9.66124e-06	2.44418e-06	2.05394e-06	1.76878e-06	6.81333e-06	2.54592e-06	4.21376e-06	4.9058e-06	1.61782e-06	3.07517e-06	1.19863e-06	3.66981e-06	5.82853e-06	2.26266e-06	9.48917e-07	3.00002e-05	1.41129e-06	1.86166e-06	1.47527e-06	2.67612e-05	4.63673e-06	8.84172e-07	8.41386e-07	7.7241e-07	2.41013e-06	7.502e-07	9.33183e-07	1.85791e-06	1.00977e-05	5.1342e-06	5.57504e-06	1.12775e-06	1.38987e-06	7.81928e-06	3.364e-06	3.77195e-06	4.46732e-07	3.44398e-07	3.63331e-06
	8,9-DiHETrE	2.19157e-06	1.16637e-05	6.02685e-07	1.92872e-06	3.22335e-06	6.01064e-06	2.62826e-06	2.89212e-05	1.49929e-05	6.12263e-06	2.14796e-06	2.26875e-05	7.64321e-06	4.64576e-05	2.47879e-06	2.28654e-05	4.12961e-06	6.05581e-06	6.43449e-06	6.13835e-06	1.79967e-06	2.42902e-06	2.43666e-05	5.73742e-06	4.11783e-05	5.63694e-06	5.50594e-06	1.06528e-05	1.9359e-05	8.20619e-06	2.23297e-06	1.93441e-06	6.50033e-06	3.46379e-06	2.96497e-06	2.66533e-06	4.6697e-07	4.64127e-06	2.98501e-05	6.82019e-06	1.65276e-06	6.14622e-06	7.68815e-06	5.66724e-06	9.60215e-06	3.7157e-06	2.24248e-06	5.69637e-06
	8-HETE	6.18841e-06	8.0326e-07	1.19654e-06	1.7077e-05	4.45079e-06	3.37166e-06	1.97888e-05	1.58261e-05	1.07579e-06	1.51961e-05	2.07357e-06	3.64122e-06	1.07251e-06	2.82049e-06	2.02926e-06	5.30165e-07	2.50267e-06	9.20924e-07	2.10724e-06	7.00191e-07	9.93816e-06	1.06523e-06	1.66633e-06	1.4537e-06	7.60918e-05	2.06733e-06	1.29827e-06	1.85089e-06	3.98219e-05	1.62947e-06	2.31798e-07	3.30642e-07	2.61186e-07	1.28756e-06	4.02831e-07	2.29143e-07	8.06297e-07	2.02096e-06	9.65033e-07	2.45911e-06	2.74385e-07	6.93729e-07	1.6782e-06	6.1586e-07	1.46982e-06	1.52436e-07	1.10824e-07	6.482e-07
	9-HODE	7.99447e-05	3.3781e-05	5.10141e-05	0.000176229	0.00011109	5.36287e-05	8.17259e-05	0.000415541	3.35276e-05	0.000163051	7.43471e-05	3.51742e-05	7.44635e-05	0.000147525	3.69083e-05	0.000144778	5.40888e-05	6.74743e-05	0.000126086	0.00014945	0.000258914	0.000212668	0.000226203	0.000123573	0.0013877	3.49529e-05	0.00051188	0.000119849	0.000255723	0.000148231	3.88324e-05	3.48412e-05	2.2215e-05	0.000377838	4.38078e-05	4.04113e-05	2.94805e-05	0.000316048	0.000168858	0.000112197	5.79772e-05	4.14056e-05	0.000207878	0.000283317	8.80493e-05	2.04664e-05	1.96646e-05	8.86002e-05
	9-HOTrE	3.74045e-07	2.87862e-07	3.33944e-07	1.00748e-06	9.87292e-07	3.70956e-07	3.56183e-07	1.26068e-06	2.44712e-07	1.23773e-06	3.60841e-07	2.36211e-07	5.88715e-07	1.16378e-06	2.50691e-07	1.27875e-06	3.75595e-07	7.03734e-07	1.08545e-06	2.0367e-06	1.99722e-06	1.36469e-06	1.3177e-06	5.92467e-07	1.40825e-05	2.13031e-07	3.02762e-06	2.72357e-06	1.82289e-06	1.10197e-06	3.1161e-07	3.20218e-07	1.89873e-07	2.83814e-06	5.62065e-07	2.51414e-07	1.46088e-07	1.58048e-06	1.12292e-06	7.48432e-07	5.76457e-07	3.38904e-07	1.15205e-06	2.40399e-06	7.51413e-07	2.31044e-07	1.84256e-07	1.09241e-06
	9-KODE	0.000112615	4.13051e-05	7.80306e-05	0.000186174	0.000142216	6.09924e-05	7.29363e-05	0.000334615	5.90772e-05	9.17578e-05	0.000109586	5.54629e-05	0.000104955	0.000193986	7.56074e-05	6.86282e-05	8.98389e-05	9.64967e-05	0.000152182	0.000262164	0.000784687	0.00011702	0.000617339	0.000219726	0.000806399	4.26257e-05	0.000643409	0.000399789	0.00027068	0.000146584	3.14908e-05	3.82982e-05	3.01447e-05	0.0001312	9.11742e-05	7.73081e-05	4.51554e-05	0.000107121	8.35586e-05	0.000190164	4.79459e-05	5.32584e-05	0.000212793	0.000134966	0.000133716	4.65686e-05	2.90192e-05	0.000134475
	AA	0.00198239	0.000271052	0.000814634	0.00288095	0.00353203	0.00132805	0.00462005	0.00233558	0.00146167	0.00382079	0.00158597	0.00145838	3.97116e-05	0.00449967	0.00318448	0.000239848	0.000731047	0.000374408	0.00036223	0.000699935	0.00110824	0.000802799	0.000530884	0.0015177	0.0325682	0.00203362	0.000159043	0.00184275	0.0477554	0.000908032	0.000203207	9.33967e-05	0.000204577	0.000195616	0.000108692	0.000125602	0.00407697	0.000666386	0.00147223	0.0055274	0.000389728	0.000546578	0.00075154	0.000333384	0.000838181	0.000105464	0.000148495	0.000537688
	DHA	0.000302159	0.000141003	0.000186494	0.000689143	0.000631572	0.000342016	0.00107021	0.000858448	0.000772193	0.00101673	0.000404918	0.000403381	4.57922e-05	0.00164487	0.00113351	0.000362865	0.000229575	0.000426849	0.000304736	0.000187699	0.000245209	0.000814999	0.000337691	0.000681462	0.0114279	0.000333734	6.26267e-05	0.0012473	0.00826588	0.000373043	6.5753e-05	3.771e-05	0.000231654	0.000122266	7.69805e-05	9.22697e-05	0.00106738	0.000204743	0.000727993	0.000982606	0.000124387	0.000328843	0.000323648	0.000188811	0.000323949	3.89727e-05	0.000133234	0.000175002
	DPA	7.31106e-06	2.87372e-06	6.75547e-06	4.95286e-05	1.39765e-05	1.42115e-05	3.31817e-05	8.26925e-05	2.75886e-05	0.000130785	1.20783e-05	1.08984e-05	2.2122e-06	3.33299e-05	1.23965e-05	2.66965e-06	1.27476e-05	7.87696e-06	1.19943e-05	3.18689e-06	6.98914e-06	7.62371e-06	5.67263e-06	1.47745e-05	0.000975213	1.31852e-05	7.67894e-06	3.00149e-05	0.00027097	2.37347e-05	1.40594e-06	1.04928e-06	1.69164e-06	4.7743e-06	1.57395e-06	1.93786e-06	1.38532e-05	1.32118e-06	9.42767e-06	1.12374e-05	2.92781e-06	4.98558e-06	1.8226e-05	4.66012e-06	4.41645e-06	1.05806e-06	1.61225e-06	2.51465e-06
	EPA	2.3163e-05	3.9555e-06	1.3773e-05	4.66084e-05	2.51436e-05	1.45939e-05	2.81534e-05	3.21222e-05	3.76357e-05	5.74063e-05	1.85125e-05	1.85949e-05	2.61317e-06	4.02325e-05	1.94255e-05	7.85595e-06	8.96879e-06	5.50946e-06	1.1105e-05	1.55704e-05	1.24856e-05	9.22038e-06	9.03035e-06	2.14092e-05	0.000527392	3.247e-05	5.78656e-06	7.20122e-05	0.000303238	1.28509e-05	2.83451e-06	1.7231e-06	3.9717e-06	1.12104e-05	1.87595e-06	1.70206e-06	3.33731e-05	1.29311e-05	1.9632e-05	6.24399e-05	3.48821e-06	6.57412e-06	8.71654e-06	4.56206e-06	7.40184e-06	9.67642e-07	1.55893e-06	7.49774e-06
	Prostaglandin F2a	7.15823e-06	4.12726e-06	1.16945e-05	1.8901e-05	1.41371e-05	7.40217e-06	5.18896e-06	8.07449e-06	7.94239e-06	6.84932e-06	3.34757e-05	8.39549e-06	1.61647e-05	2.06833e-05	3.30519e-05	1.96258e-06	9.80411e-06	1.11629e-05	8.40074e-06	2.19505e-05	2.79317e-05	9.76031e-06	1.48553e-05	1.04368e-05	4.60305e-05	3.03587e-06	4.30695e-05	1.22444e-05	2.07679e-05	2.2578e-05	6.7807e-06	4.90419e-06	1.32152e-05	1.56039e-05	8.39849e-06	1.24456e-05	1.08234e-05	1.77724e-05	2.51388e-05	2.52808e-05	8.80214e-06	1.11786e-05	3.72145e-05	1.66533e-05	2.57106e-05	6.36955e-06	3.33877e-06	1.11075e-05
	Tetranor PGDM/PGEM	0.000225947	0.000168875	0.000975097	0.000174971	0.00031136	0.00025932	0.000486394	0.0010334	0.000681041	0.00120908	0.000575648	0.000193727	0.000618691	0.00115005	0.000280369	0.000198724	8.6913e-05	0.000381307	0.000839872	0.00062569	0.000651571	8.83118e-05	0.000340296	0.000401813	0.00030634	7.6878e-05	0.000657314	0.000236451	0.000285996	0.000903658	0.000328743	0.000587094	0.000556222	0.000506375	0.000987186	0.000234251	0.000240327	0.000573575	0.000566866	0.00464182	0.000348826	0.000459112	0.00108727	0.000745059	0.00058324	0.000178883	0.000121836	0.000515529
	Trans-EKODE	1.41962e-05	5.67865e-06	6.41632e-06	1.97128e-05	1.49143e-05	6.44417e-06	5.45491e-06	1.11053e-05	6.2484e-06	9.82623e-06	1.61805e-05	6.29958e-06	1.44694e-05	2.56001e-05	1.01231e-05	7.72892e-06	1.15861e-05	1.12936e-05	1.4302e-05	3.24426e-05	3.49614e-05	1.31123e-05	4.85439e-05	2.11255e-05	4.00361e-05	3.38848e-06	8.88497e-05	1.03639e-05	2.32968e-05	1.55138e-05	3.82035e-06	5.91417e-06	4.1726e-06	1.11877e-05	1.30296e-05	1.18924e-05	4.74724e-06	1.1808e-05	7.66646e-06	2.4946e-05	6.3829e-06	8.14862e-06	2.96467e-05	2.03998e-05	1.85185e-05	7.37753e-06	4.28349e-06	1.77882e-05
	Creatinin (mM)	14.6251	41.5646	27.5995	10.9603	13.613	27.1896	46.8519	26.2262	33.6429	23.8092	10.9798	36.0393	16.4177	7.654	20.4397	35.4278	17.1837	19.5414	14.399	5.40382	4.8162	12.4532	4.73415	8.2812	8.18973	54.2094	1.90585	14.9121	10.6425	15.471	59.5607	36.6397	53.7261	24.8272	17.0679	16.1287	40.4511	14.2748	32.4584	7.78177	33.4501	26.0031	6.0337	14.6637	11.3854	28.0769	50.7121	11.1883
	The data represent the concentration (mmol/mmol creatine) of each analyte normalized against the detector response area relative to IS-PC (16:0/16:0 d6) intensity and creatinine levels
[truncated: 12 more columns]
