# Supplementary material for: Cross-Classification of Human Urinary Lipidome by Sex, Age, and Body Mass Index
Source: PLoS One. 2016 Dec 14;11(12):e0168188. doi: 10.1371/journal.pone.0168188 (PMC5156423; doi:10.1371/journal.pone.0168188)
Supplement: S8 Table — (XLSX) [file pone.0168188.s009.xlsx]

## Sheet: S8 Table (revise)
	S8 Table. Sex, age, and BMI-related differences (fold changes and statistical analysis) in the levels of urinary oxlipins.
		Sex											Age												BMI
		Median fold	p value	qvalue		Median fold	p value	qvalue		Median fold	p value	qvalue	Median fold	p value	qvalue		Median fold	p value	qvalue		Median fold	p value	qvalue		Median fold	p value	qvalue
		Change	Mann Whitney	Benjamini-Hochberg		Change	Mann Whitney	Benjamini-Hochberg		Change	Mann Whitney	Benjamini-Hochberg	Change	Mann Whitney	Benjamini-Hochberg		Change	Mann Whitney	Benjamini-Hochberg		Change	Mann Whitney	Benjamini-Hochberg		Change	Mann Whitney	Benjamini-Hochberg
		Women/Men	U-test	procedure for FDR		YW/YM	U-test	procedure for FDR		EW/EM	U-test	procedure for FDR	(Elderly/Young)	U-test	procedure for FDR		YW/EW	U-test	procedure for FDR		YM/EM	U-test	procedure for FDR		Low BMI/High BMI	U-test	procedure for FDR
	Linoleic acid (18:2 FA) & its metabolites
	9-HODE	1.75157	0.10262	0.165333		1.28436	0.967417	0.967417		2.10465	0.00987482	0.0357962	1.48726	0.202526	0.652585		0.502349	0.0209023	0.151542		0.823188	0.870194	1.0972		1.08411	0.690426	0.834265
	9-KODE	1.39195	0.0215834	0.0447084		1.09813	0.412376	0.569471		2.69885	0.00754355	0.0312518	1.34204	0.0399707	0.193192		0.4176	0.012799	0.123724		1.02633	0.65287	0.996486		1.29729	0.668793	0.84326
	Trans-EKODE	1.21644	0.306576	0.386552		0.904843	0.934887	1.00414		1.37757	0.115979	0.280282	1.2914	0.0357671	0.207449		0.652523	0.026354	0.127378		0.993426	0.512486	0.990807		1.26519	0.280324	0.625338
	Arachidonic acids (20:4 FA) & its metabolites
	AA	2.69312	0.0114719	0.0332685		5.08661	0.012799	0.0337429		1.12407	0.412376	0.569471	0.680019	0.708193	0.855733		2.46935	0.0891948	0.369521		0.545691	0.412376	0.854207		0.537773	0.0993262	0.26186
	11,12-diHETrE	1.2271	0.112426	0.171598		1.38357	0.345311	0.527053		1.20364	0.187268	0.417753	1.10705	0.697296	0.962933		0.867372	0.623594	0.904212		0.75457	0.967417	1.07904		0.944698	0.585079	0.807967
	11,12-EET	1.65744	0.0223583	0.043226		2.36218	0.014386	0.0347661		1.45201	0.389233	0.594093	1.01592	0.66273	1.01154		0.819518	0.77484	0.936265		0.503749	0.245432	1.01679		1.06086	0.608204	0.801723
	11-dehydro-TXB2	1.27234	0.299631	0.394969		1.23441	0.412376	0.597945		1.18816	0.566774	0.657458	0.819425	0.542205	0.982746		1.24514	0.623594	0.861154		1.19849	0.623594	1.00468		1.44192	0.219236	0.52982
	12-HETE	24.2361	1.47366e-10	2.13681e-09		18.2049	3.50702e-06	0.000101704		22.5902	1.55495e-05	0.000225468	0.54268	0.335396	0.884225		2.03975	0.412376	0.79726		2.5311	0.324548	1.04577		0.108407	0.003809	0.0552305
	14,15-diHETrE	1.44631	0.0514015	0.0931651		1.9751	0.0742045	0.153709		1.38526	0.436289	0.575109	0.92618	0.467066	0.967494		0.978825	1	1		0.686511	0.216857	1.04814		0.890001	0.723343	0.839078
	14,15-EET	2.12828	0.006969	0.0252626		2.99482	0.00864181	0.0278458		1.40547	0.187268	0.387913	0.813358	0.74123	0.859827		2.20509	0.345311	0.770309		1.03484	0.902462	1.09048		0.634829	0.0903919	0.291263
	15-HETE	2.0942	0.00730121	0.0235261		2.9459	0.00864181	0.0250612		1.41091	0.201679	0.365544	0.837117	0.752351	0.808081		2.18071	0.366875	0.759956		1.04443	0.902462	1.04686		0.642374	0.0962741	0.279195
	2,3-dinor-8-iso-PGF2a	1.82083	0.00288295	0.0119436		1.42843	0.160685	0.310659		2.24723	0.00570351	0.027567	1.36273	0.159053	0.576567		0.617355	0.00987482	0.143185		0.971231	1	1.03571		0.946567	0.88277	0.914297
	5,6-diHETrE	0.959508	0.82007	0.880815		0.993928	0.902462	1.04686		0.803062	0.806334	0.835131	1.18868	0.74123	0.826757		0.941543	0.806334	0.935347		0.760737	0.967417	1.03908		0.947295	0.906096	0.906096
	5,6-EET	1.97219	0.018359	0.0409546		3.8714	0.00367431	0.0152221		1.19726	0.813179	0.813179	0.724818	0.361674	0.874044		2.09166	0.026354	0.152853		0.646863	0.561291	0.957496		0.828651	0.560757	0.813097
	5-HETE	1.6126	0.0532353	0.0908131		1.62482	0.249556	0.452321		1.60078	0.201679	0.344041	0.803627	0.763523	0.790792		0.981659	0.806334	0.899372		0.967137	0.870194	1.14707		0.8112	0.525632	0.802281
	8,9-diHETrE	1.07658	0.320778	0.387606		1.29504	0.65287	0.823184		1.07759	0.389233	0.564388	1.15611	0.235886	0.684069		0.979194	0.460959	0.742656		0.814777	0.366875	1.06394		0.939154	0.344232	0.665515
	8-HETE	3.06153	3.69832e-06	2.14502e-05		4.8602	8.979e-05	0.000520782		2.46825	0.00230646	0.0133775	0.779015	0.411898	0.918849		2.02341	0.187268	0.60342		1.02759	0.851918	1.17646		0.475559	0.0200461	0.116268
	PGF2a	1.02563	0.719149	0.834213		0.635288	0.285441	0.486929		1.41466	0.187268	0.362052	0.892469	0.643768	1.03718		0.68566	0.249556	0.723713		1.52683	0.115979	0.840846		1.25755	0.30068	0.622838
	Tetranor PGDM and PGEM	0.747399	0.900743	0.932913		0.85804	0.486365	0.641117		1.08621	0.623594	0.695547	0.581953	0.025317	0.244731		1.42932	0.412376	0.747431		1.80941	0.0209023	0.303083		0.746306	0.391548	0.667935
	Linolenic acid (18:3 FA) metabolites
	DPA	3.5643	0.000109338	0.000528467		3.16465	0.00083409	0.00403144		3.53062	0.0408399	0.118436	0.929335	0.889136	0.889136		1.16527	0.539299	0.82314		1.30002	0.539299	0.977479		0.412772	0.0493241	0.2384
	9-HOTrE	1.70937	0.2369	0.327148		0.64351	0.693518	0.838001		2.24044	0.011256	0.0362694	2.29084	0.0303151	0.219785		0.281517	0.00118667	0.0344136		0.980127	1	1		1.33688	0.749369	0.835835
	Eicosapentaenoic acid (20:5 FA) & its metabolites
	EPA	2.10396	0.0119858	0.0315989		3.52336	0.00754355	0.0273454		1.32409	0.486365	0.613243	0.754087	0.664981	0.964222		1.85518	0.267097	0.704165		0.697182	0.160685	0.931976		0.592175	0.0744382	0.269838
	5-HEPE	1.14726	0.797323	0.889321		1.09482	0.967417	1.00197		1.13448	0.743702	0.798791	1.68304	0.0934971	0.387345		0.584246	0.14848	0.53824		0.605413	0.389233	1.02616		0.934152	0.813468	0.873725
	12-HEPE	5.4381	1.86326e-09	1.80115e-08		5.88895	3.43224e-05	0.000248837		7.37933	5.61897e-05	0.000543167	1.02957	0.697296	0.919163		0.549717	0.682674	0.860763		0.68884	0.412376	0.919915		0.395919	0.0159574	0.115691
	Docosahexsaenoic acid (22:6 FA) & its metabolites
	DHA	1.93518	0.0161784	0.0390979		3.0847	0.0234961	0.0524145		1.70405	0.249556	0.402063	1.04989	0.643768	1.09819		1.74051	0.65287	0.860601		0.961493	0.389233	0.940647		0.802339	0.0629465	0.260778
	10-HDoHE	3.84929	3.25065e-07	2.35672e-06		5.30894	2.04103e-05	0.0001973		3.10014	0.00140235	0.0101671	1.29606	0.505836	0.977949		1.06474	0.967417	1.00197		0.62175	0.290089	1.05157		0.322566	0.0023751	0.068878
	14-HDoHE	18.5718	3.56733e-11	1.03453e-09		16.2549	1.17717e-05	0.00017069		20.0155	2.51422e-06	7.29125e-05	0.658013	0.708193	0.892939		0.985529	0.838135	0.900219		1.21353	0.743702	1.07837		0.152041	0.00621199	0.0600493
	20-HDoHE	1.36227	0.235886	0.342034		1.99047	0.934887	1.04276		2.15181	0.0742045	0.19563	0.393166	0.0191023	0.276983		2.04293	0.324548	0.784325		2.20852	0.0294965	0.285133		0.604082	0.367423	0.665954
	Statistical analysis was performed using the Mann-Whitney U-test test for comparison of levels between sex, age, and BMI. YW: young women. YM: young men. EW: elderly women. EM: elderly men. Bold indicates p<0.05 by the Mann-Whitney U-test and q<0.05 by Benjamini-Hochberg procedure for FDR.
