# Supplementary material for: Cross-Classification of Human Urinary Lipidome by Sex, Age, and Body Mass Index
Source: PLoS One. 2016 Dec 14;11(12):e0168188. doi: 10.1371/journal.pone.0168188 (PMC5156423; doi:10.1371/journal.pone.0168188)
Supplement: S9 Table — (XLSX) [file pone.0168188.s010.xlsx]

## Sheet: S9 Table (revise)
	S9 Table. Sex, age, and BMI-related differences (fold changes and statistical analysis) in the levels of lipid metabolites.
		Sex								Age								BMI
		Median fold	p value		Median fold	p value		Median fold	p value	Median fold	p value		Median fold	p value		Median fold	p value	Median fold	p value
		Change	Mann Whitney		Change	Mann Whitney		Change	Mann Whitney	Change	Mann Whitney		Change	Mann Whitney		Change	Mann Whitney	Change	Mann Whitney
		Women/Men	U-test		YW/YM	U-test		EW/EM	U-test	(Elderly/Young)	U-test		YW/EW	U-test		YM/EM	U-test	Low BMI/High BMI	U-test
	PC(16:0/18:2)+HCOO	1.14775	0.150416		1.27369	0.304591		0.938223	0.232812	1.23193	0.306576		0.735241	0.232812		0.416242	0.160685	0.891737	0.280324
	PC(16:0/18:1)+HCOO	1.29297	0.10908		1.50055	0.216857		1.18701	0.249556	1.71352	0.163508		0.645241	0.249556		0.510418	0.539299	1.12928	0.723343
	PC(16:0/22:6)+HCOO	1.24996	0.982441		0.758868	0.436289		1.52616	0.0502224	2.55367	0.119358		0.279659	0.0502224		0.562422	0.743702	1.87332	0.605556
	SM(d18:1/16:0)+HCOO	1.36699	0.0906026		1.52819	0.0975258		1.22405	0.682674	0.99208	0.797323		1.10705	0.682674		0.886721	0.389233	0.772883	0.119262
	PC(39:6)+HCOO	1.40834	0.279422		1.12993	0.838135		1.63542	0.173609	1.51706	0.358101		0.563512	0.173609		0.815607	0.806334	1.73974	0.159162
	G2Cer(42:2)+HCOO	1.09886	0.150416		1.24941	0.436289		1.00899	0.65287	1.49611	0.697296		0.739206	0.65287		0.596961	0.934887	1.41028	0.723343
	G3Cer(34:1)+HCOO	0.775805	0.398003		0.521417	1		1.00895	0.412376	1.44078	0.854466		0.473629	0.412376		0.916476	0.65287	2.10826	0.359588
	PI(40:5)-H	1.01196	0.786011		0.700115	0.512486		1.23063	0.0674962	1.87108	0.150416		0.398933	0.0674962		0.701225	0.870194	1.76177	0.208245
	G3Cer(42:2)+HCOO	1.01579	0.241798		0.771851	0.712965		1.19659	0.216857	1.67264	0.272894		0.478088	0.216857		0.741176	0.806334	2.09736	0.248489
	SM(39:2)+HCOO	1.38063	0.313625		1.2188	0.743702		1.49444	0.486365	1.59851	0.719149		0.573578	0.486365		0.703297	0.870194	1.63793	0.21369
	SM(43:3)+HCOO	1.07578	0.994147		0.576067	0.249556		1.49772	0.0294965	1.87685	0.207837		0.324774	0.0294965		0.844383	0.806334	1.82288	0.192505
	Cer(d18:1/22:0)+H	1.28557	0.134204		0.970436	0.539299		1.79741	0.14848	0.874076	0.389819		0.876928	0.902462		1.62422	0.436289	1.05268	0.605556
	PC(16:0/18:2)+H	1.13725	0.350429		1.19047	0.389233		1.10064	0.594884	1.39432	0.0906026		0.743922	0.267097		0.687784	0.173609	0.864346	0.351858
	Cer(d18:1/16:0)+H	1.52384	0.279422		0.938885	0.967417		2.53976	0.0975258	1.0512	0.643768		0.642032	0.216857		1.73675	0.682674	1.13915	0.248489
	SM(d18:1/16:0)+H	1.28919	0.0746958		1.63631	0.0891948		1.07586	0.539299	1.28126	0.187179		0.934707	0.902462		0.61456	0.0612792	0.805127	0.230631
	Cer(d18:1/14:0)+H	1.43969	0.241798		0.945108	0.682674		2.14824	0.0502224	1.12977	0.865995		0.630278	0.249556		1.43263	0.249556	1.01086	0.824934
	PC(16:0/18:1)+H	1.1644	0.373755		1.52463	0.106446		0.968169	1	1.43116	0.187179		0.85781	0.682674		0.544724	0.0612792	0.636822	0.230631
	Statistical analysis was performed using the Mann-Whitney U-test test for comparison of levels between sex, age, and BMI. YW: young women. YM: young men. EW: elderly women. EM: elderly men.
